# Supplementary material for: Peptide ormosils as cellular substrates
Source: Royal Society of Chemistry journal article supplement (doi:10.1039/b705393b), 2007-01-01

Supplementary Figure 1. Phase traces from AFM imaging. (A) NID thin film (B) KDI thin film (C) RGD thin film (D) YIG thin film

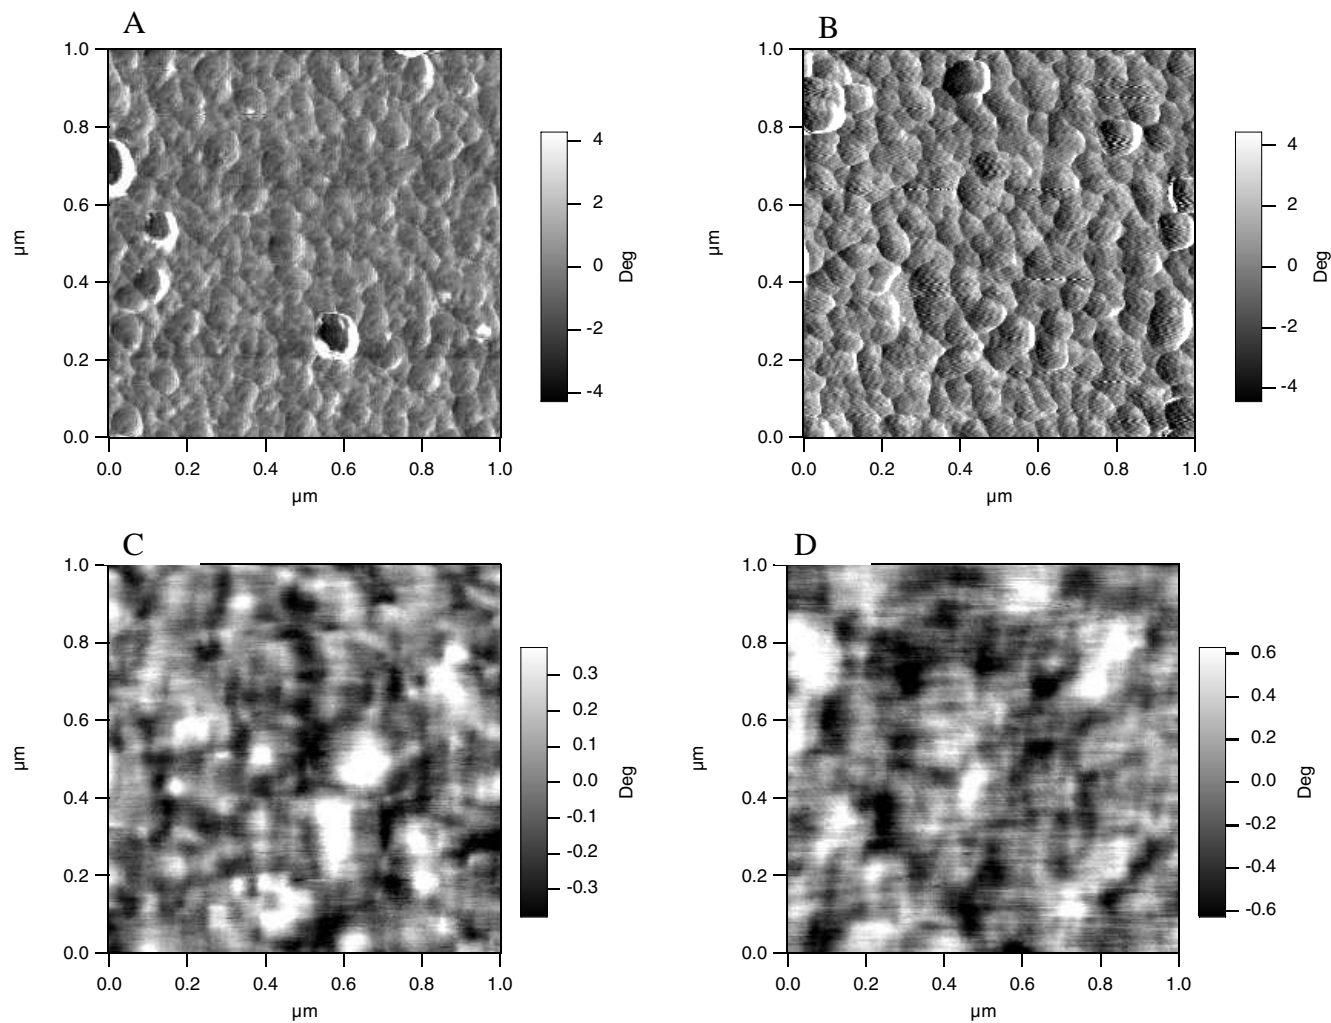

Supplement: b705393b.pdf [file b705393b.pdf]
